# Supplementary material
Source: PubMed Central journal article supplement (PMC6413791)
Supplement: jciinsight-4-125442-s058.pdf [file jciinsight-4-125442-s058.pdf]

**Supplementary Table 1. Antibodies used in mass cytometry analysis.**

| #  | Clone   | Marker            | Tag   | Vendor         |
|----|---------|-------------------|-------|----------------|
| 1  | HI30    | CD45              | 89Y   | Fluidigm       |
| 2  | HCD57   | CD57              | 115In | BioLegend      |
| 3  | 11A9    | CCR6 (CD196)      | 141Pr | BD Biosciences |
| 4  | HIB19   | CD19              | 142Nd | Fluidigm       |
| 5  | UCHT2   | CD5               | 143Nd | BioLegend      |
| 6  | NP-6G4  | CD195 (CCR5)      | 144Nd | Fluidigm       |
| 7  | RPA-T4  | CD4               | 145Nd | Fluidigm       |
| 8  | SK1     | CD8a              | 146Nd | BioLegend      |
| 9  | Bu15    | CD11c             | 147Sm | Fluidigm       |
| 10 | WM59    | CD31              | 148Nd | BioLegend      |
| 11 | DX29    | CD278 (ICOS)      | 151Eu | Fluidigm       |
| 12 | IP26    | TCR $\alpha\beta$ | 152Sm | BioLegend      |
| 13 | UCHT1   | CD3 $\epsilon$    | 154Sm | Fluidigm       |
| 14 | 205410  | CD194 (CCR4)      | 155Gd | R & D Systems  |
| 15 | G025H7  | CXCR3             | 157Gd | BioLegend      |
| 16 | CD28.2  | CD28              | 160Gd | BioLegend      |
| 17 | HP-3G10 | CD161             | 161Dy | BioLegend      |
| 18 | B56     | Ki-67             | 162Dy | Fluidigm       |
| 19 | L243    | HLA-DR            | 163Dy | BioLegend      |
| 20 | BJ18    | CD44              | 164Dy | BioLegend      |
| 21 | A019D5  | CD127             | 165Ho | Fluidigm       |
| 22 | L128    | CD27              | 167Er | Fluidigm       |

|    |          |                |       |               |
|----|----------|----------------|-------|---------------|
| 23 | HIT2     | CD38           | 168Er | BioLegend     |
| 24 | HI100    | CD45RA         | 169Tm | Fluidigm      |
| 25 | 14D3     | CD152 (CTLA-4) | 170Er | Fluidigm      |
| 26 | EH12.2H7 | CD279 (PD-1)   | 172Yb | BioLegend     |
| 27 | A1       | CD39           | 173Yb | BioLegend     |
| 28 | 51505    | CXCR5          | 174Yb | R & D Systems |
